# Supplementary material
Source: ML conference proceedings conference paper supplement (https://proceedings.neurips.cc/paper_files/paper/2010/hash/11b921ef080f7736089c757404650e40-Abstract.html)
Supplement: Supplementary file [file 11b921ef080f7736089c757404650e40-Supplemental.zip]

---

# Supplementary Material for Effects of Synaptic Weight Diffusion on Learning in Decision Making Networks

---

**Kentaro Katahira<sup>1,2,3</sup>, Kazuo Okanoya<sup>1,3</sup> and Masato Okada<sup>1,2,3</sup>**

<sup>1</sup>ERATO Okanoya Emotional Information Project, Japan Science Technology Agency

<sup>2</sup>Graduate School of Frontier Sciences, The University of Tokyo

<sup>3</sup>RIKEN Brain Science Institute

Here, we present the derivation of the ensemble averages that appeared in Equation (9) with omitting constants  $X_0$  and  $\sigma_p$ .

## 1 Derivation of $\langle h^A | a \rangle$

By definition,

$$\begin{aligned}
 p_A \langle h^A | A \rangle &= p_A \frac{\int_{-\infty}^{\infty} dh^B p(h^B) \int_{h^B}^{\infty} h^A dh^A p(h^A)}{\int_{-\infty}^{\infty} dh^B p(h^B) \int_{h^B}^{\infty} dh^A p(h^A)} \\
 &= \int_{-\infty}^{\infty} dh^B p(h^B) \int_{h^B}^{\infty} h^A dh^A p(h^A) \\
 &= \int_{-\infty}^{\infty} dh^B p(h^B) \left[ \frac{1}{\sqrt{2\pi}l_A} \int_{h^B}^{\infty} h^A dh^A \exp\left(-\frac{(h^A - \bar{J}_A)^2}{2l_A^2}\right) \right].
 \end{aligned} \tag{1}$$

Replacing the variable as  $z = \frac{(h^A - \bar{J}_A)}{l_A}$ , and hence  $h^A = l_A z + \bar{J}_A$ ,  $dh^A = l_A dz$ , we calculate the second integral as

$$\begin{aligned}
 &\frac{1}{\sqrt{2\pi}l_A} \int_{h^B}^{\infty} h^A dh^A \exp\left(-\frac{(h^A - \bar{J}_A)^2}{2l_A^2}\right) \\
 &= \frac{1}{\sqrt{2\pi}} \int_{\frac{h^B - \bar{J}_A}{l_A}}^{\infty} dz l_A z \exp\left(-\frac{z^2}{2}\right) + \frac{\bar{J}_A}{\sqrt{2\pi}} \int_{\frac{h^B - \bar{J}_A}{l_A}}^{\infty} dz \exp\left(-\frac{z^2}{2}\right).
 \end{aligned} \tag{2}$$

The first term in Equation (2) is

$$\frac{1}{\sqrt{2\pi}} \int_{\frac{h^B - \bar{J}_A}{l_A}}^{\infty} dz l_A z \exp\left(-\frac{z^2}{2}\right) = \frac{l_A}{\sqrt{2\pi}} \exp\left(-\frac{(h^B - \bar{J}_A)^2}{2l_A^2}\right). \tag{3}$$

Multiplying this by  $\int_{-\infty}^{\infty} dh^B p(h^B)$  leads to

$$\frac{l_A^2}{\sqrt{2\pi}(l_A^2 + l_B^2)} \exp\left(-\frac{(\bar{J}_A - \bar{J}_B)^2}{2(l_A^2 + l_B^2)}\right). \tag{4}$$

Multiplying the second term in Equation 2 by  $\int_{-\infty}^{\infty} dh^B p(h^B)$  leads to

$$\frac{\bar{J}_A}{2} \operatorname{erfc}\left(-\frac{\bar{J}_A - \bar{J}_B}{\sqrt{2(l_A^2 + l_B^2)}}\right) = \bar{J}_A p_A. \tag{5}$$

Taken together, we obtain

$$p_A \langle h^A | A \rangle = \frac{l_A^2}{\sqrt{2\pi(l_A^2 + l_B^2)}} \exp\left(-\frac{(\bar{J}_A - \bar{J}_B)^2}{2(l_A^2 + l_B^2)}\right) + p_A \bar{J}_A, \quad (6)$$

from which we obtain the first equation of (9) in main text.

## 2 Deviation of $\langle \tilde{x}_a | a \rangle$

Since  $\tilde{x}^A$  is a summation of  $N$  random variables that independently obey a Gaussian distribution with mean  $1/N$  and variance  $1/N$ , it obeys a Gaussian distribution whose mean is one, and variance is one. Using Bayes' theorem,

$$\begin{aligned} p_A \langle \tilde{x}_A | A \rangle &= p_A \frac{\int_{-\infty}^{\infty} d\tilde{x}^A \tilde{x}^A p(\tilde{x}^A | a = A)}{\int_{-\infty}^{\infty} d\tilde{x}^A p(\tilde{x}^A | a = A)} \\ &= p_A \frac{\int_{-\infty}^{\infty} d\tilde{x}^A \tilde{x}^A p(a = A | \tilde{x}^A) p(\tilde{x}^A) / p(a = A)}{\int_{-\infty}^{\infty} d\tilde{x}^A p(a = A | \tilde{x}^A) p(\tilde{x}^A) / p(a = A)} \\ &= \int_{-\infty}^{\infty} d\tilde{x}^A \tilde{x}^A p(a = A | \tilde{x}^A) p(\tilde{x}^A) \end{aligned} \quad (7)$$

Since the variance of  $h^A$  given the value of  $\tilde{x}^A$  is  $l_A^2 - \bar{J}_A^2$ ,  $p(a = A | \tilde{x}^A)$  is calculated as

$$\begin{aligned} p(a = A | \tilde{x}^A) &= \Pr[h^A > h^B | \tilde{x}^A] \\ &= \frac{1}{2} \operatorname{erfc}\left(-\frac{\bar{J}_A - \bar{J}_B \tilde{x}^A}{\sqrt{2(l_A^2 - \bar{J}_A^2 + l_B^2)}}\right). \end{aligned} \quad (8)$$

Substituting this into Equation 7, we arrive at the second equation of (9) in main text.
